# Supplementary material
Source: Springer Nature journal article supplement (https://www.springermedizin.de/resource/supplementary/12889_2006_361_MOESM3_ESM.pdf/9501374)

Employees (thousands)

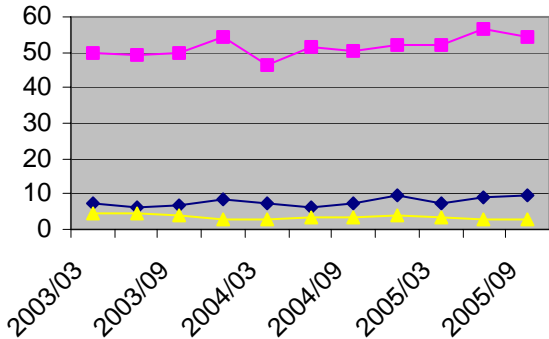

- ◆ Pubs/taverns/bars
- Cafes/Restaurants
- ▲ Clubs

Supplement: MOESM3 [file 9501374]
